# Supplementary material for: Induction of human pluripotent stem cells into kidney tissues by synthetic mRNAs encoding transcription factors
Source: Sci Rep. 2019 Jan 29;9:913. doi: 10.1038/s41598-018-37485-8 (PMC6351687; doi:10.1038/s41598-018-37485-8)
Supplement: Supplementary file 2 — Supplementary Information [file 41598_2018_37485_MOESM2_ESM.pdf]

# Supplementary Information

## Induction of human pluripotent stem cells into kidney tissues by synthetic mRNAs encoding transcription factors

Ken Hiratsuka<sup>1,2</sup>, Toshiaki Monkawa<sup>2,3</sup>, Tomohiko Akiyama<sup>1</sup>, Yuhki Nakatake<sup>1</sup>, Mayumi Oda<sup>1</sup>, Sravan Kumar Goparaju<sup>1</sup>, Hiromi Kimura<sup>1</sup>, Nana Chikazawa-Nohtomi<sup>1</sup>, Saeko Sato<sup>1</sup>, Keiichiro Ishiguro<sup>1,4</sup>, Shintaro Yamaguchi<sup>2</sup>, Sayuri Suzuki<sup>2</sup>, Ryuji Morizane<sup>2, 5, 6, 7</sup>, Shigeru B.H. Ko<sup>1</sup>, Hiroshi Itoh<sup>2</sup>, and Minoru S.H. Ko<sup>1, \*</sup>

<sup>1</sup> Department of Systems Medicine, Keio University School of Medicine, 35 Shinanomachi, Shinjuku, Tokyo 160-8582, Japan

<sup>2</sup> Department of Nephrology, Endocrinology, and Metabolism, Keio University School of Medicine, 35 Shinanomachi, Shinjuku, Tokyo 160-8582, Japan

<sup>3</sup> Medical Education Center, Keio University School of Medicine, 35 Shinanomachi, Shinjuku, Tokyo 160-8582, Japan

<sup>4</sup> Institute of Molecular Embryology and Genetics, Kumamoto University, 2-2-1 Honjo, Chuo-ku, Kumamoto 860-0811, Japan

<sup>5</sup> Renal Division, Department of Medicine, Brigham and Women's Hospital, Boston, Massachusetts, USA

<sup>6</sup> Department of Medicine, Harvard Medical School, Boston, Massachusetts, USA

<sup>7</sup> Harvard Stem Cell Institute, Cambridge, Massachusetts, USA

\*Correspondence to be addressed.

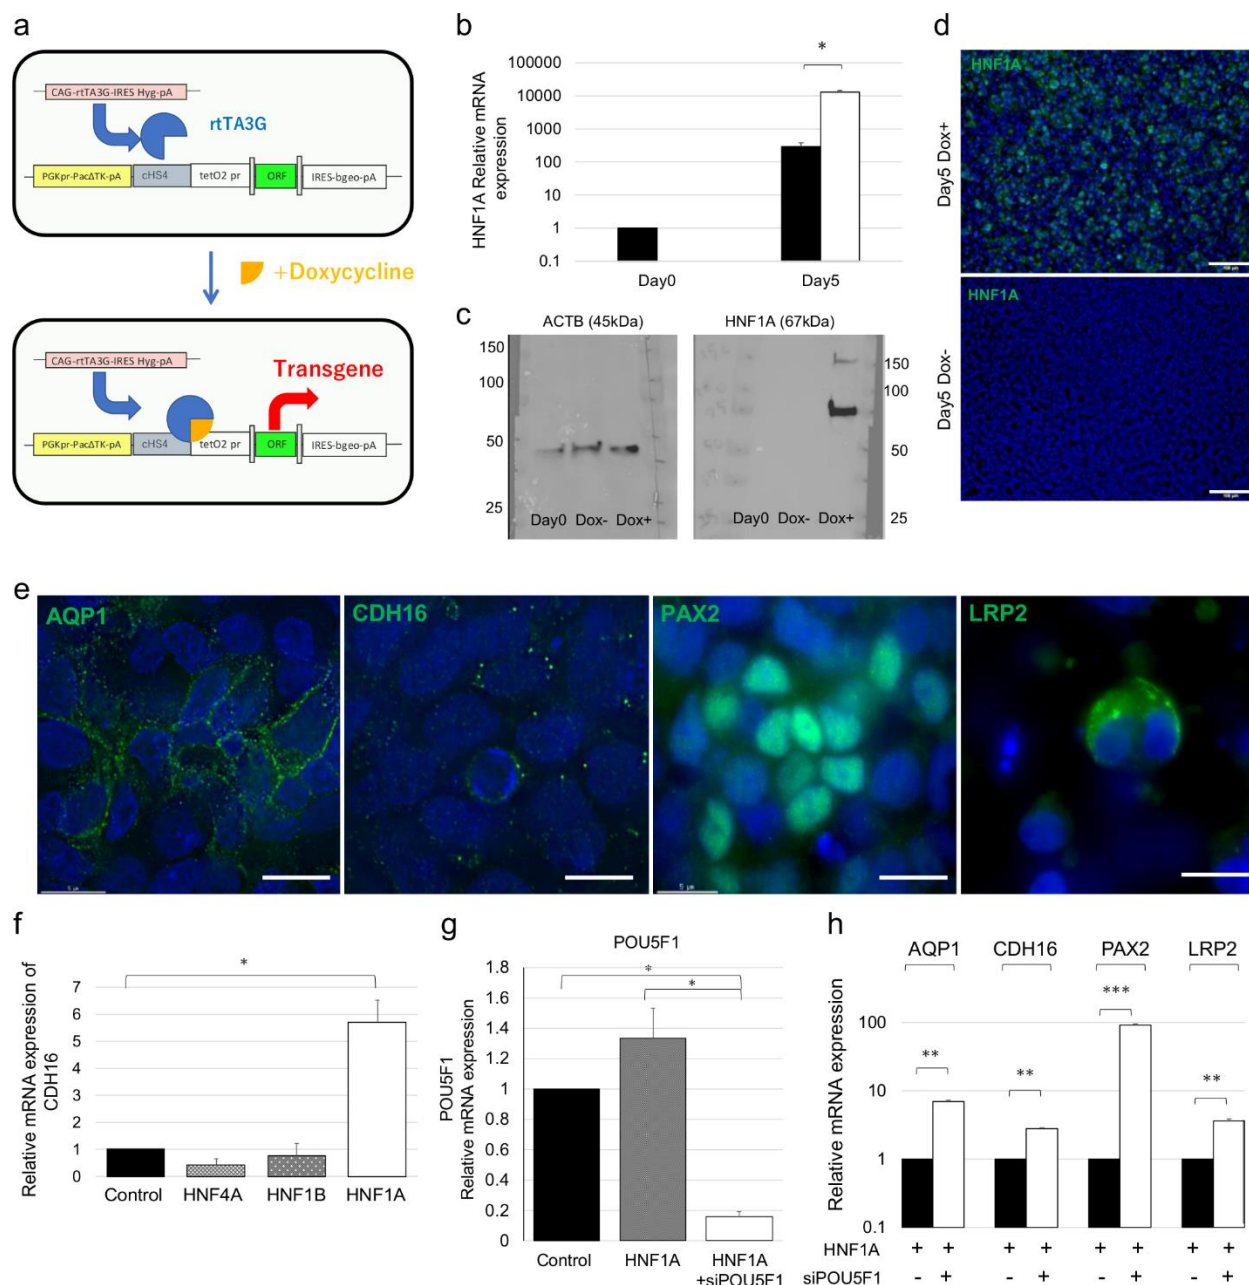

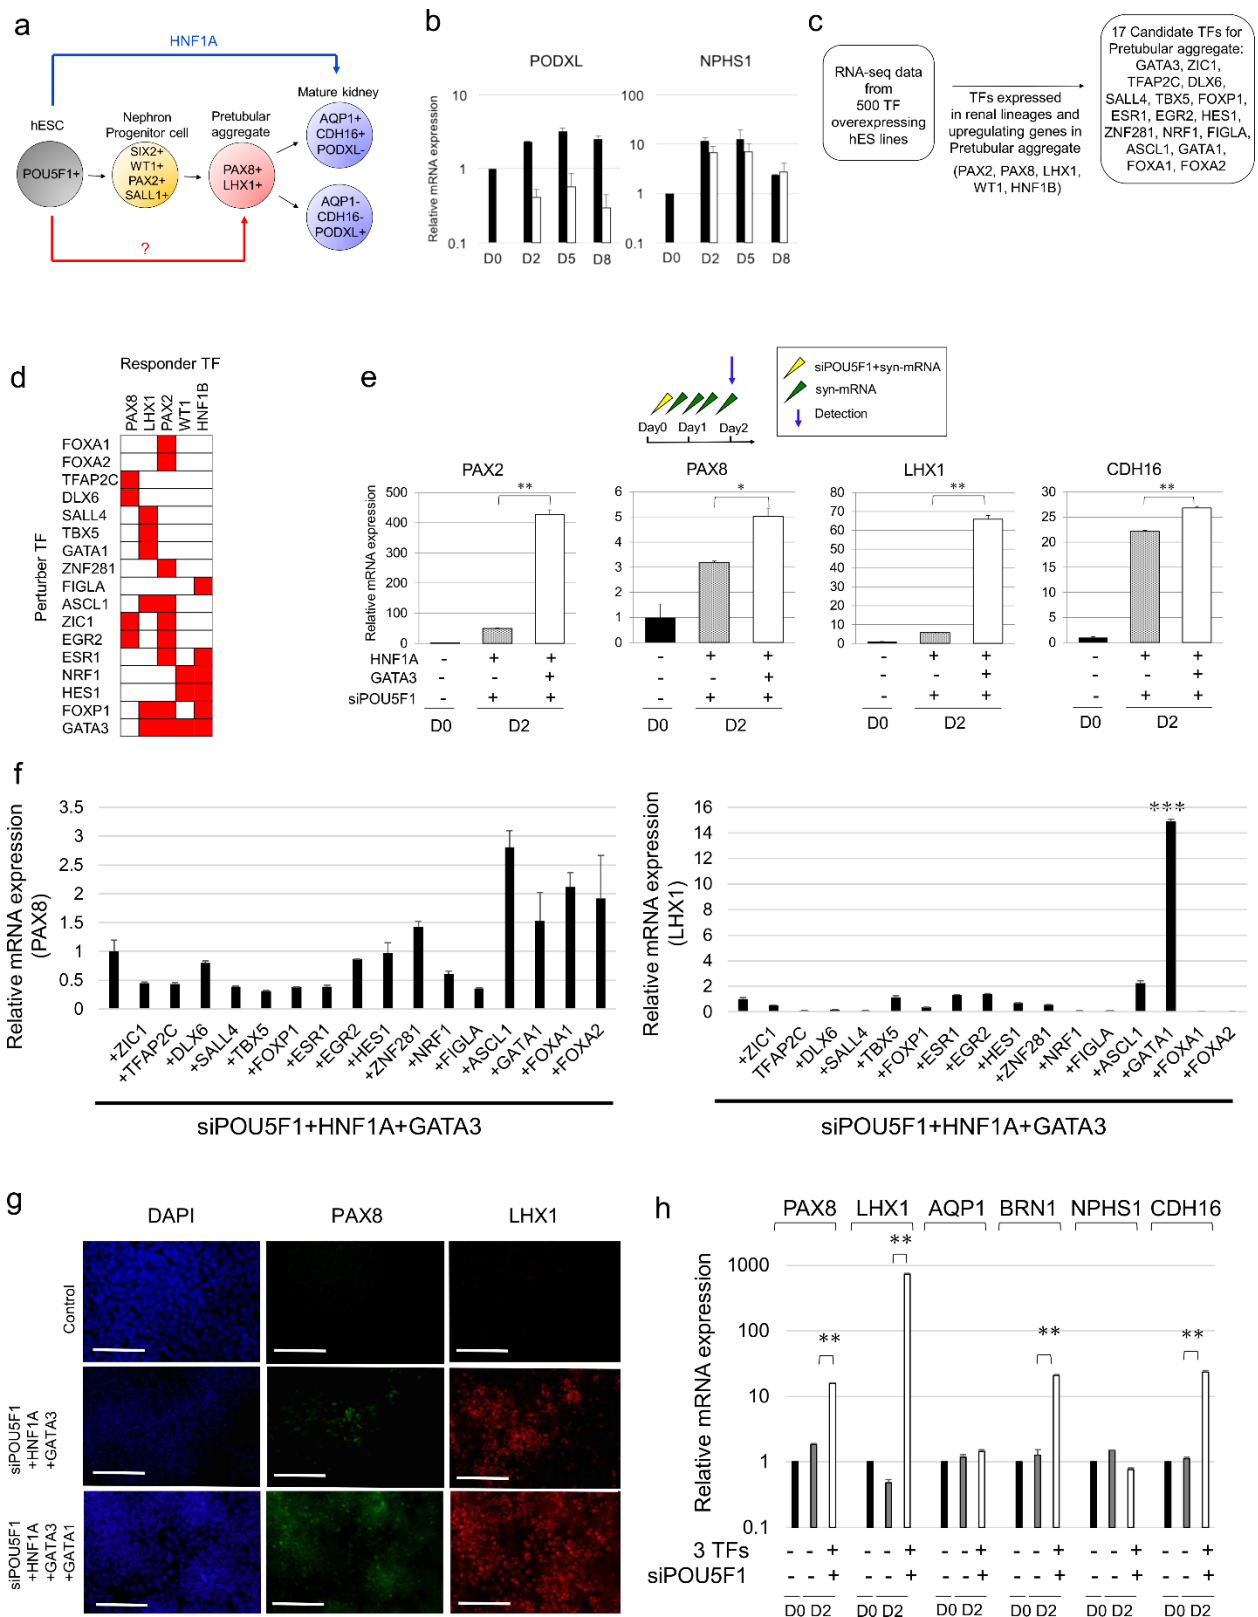

### Supplementary Figure S2

(a) Diagram of differentiation into pretubular aggregate. (b) Relative mRNA expression levels of podocyte markers (PODXL, NPHS1) in transgene HNF1A-induced hESCs (white bars) and in transgene un-induced hESCs (black bars). Data represent mean +s.e.m. (c) Flowchart of an approach to identify pretubular aggregate-specific TFs. (d) 17 candidate TFs that upregulate pretubular aggregate markers. (e) Relative mRNA expression levels of pretubular aggregate markers (PAX2, PAX8, LHX1), and CDH16 after transfecting HNF1A and GATA3 mRNAs into hESCs. Data represent mean +s.e.m. (f) Relative mRNA expression levels of pretubular aggregate markers (PAX8, LHX1). The synergistic effect was observed after transfecting GATA1 in addition to HNF1A and GATA3. Expression of PAX8 and LHX1 are shown as fold induction relative to the expression levels after transfecting HNF1A and GATA3. Data represents mean +s.e.m. (g) Immunocytochemistry for PAX8 and LHX1 on day 2 of differentiation. Control indicates corresponding control cells without any TFs. Scale bar, 200  $\mu$ m. (h) Relative mRNA expression levels of pretubular aggregate markers (PAX8, LHX1), AQP1, BRN1, NPHS1, and CDH16 after transfecting HNF1A, GATA3 and GATA1 mRNAs into hESCs. Podocyte marker, NPHS1 is not upregulated after transfecting 3TFs for 2 days. Data represent mean +s.e.m.

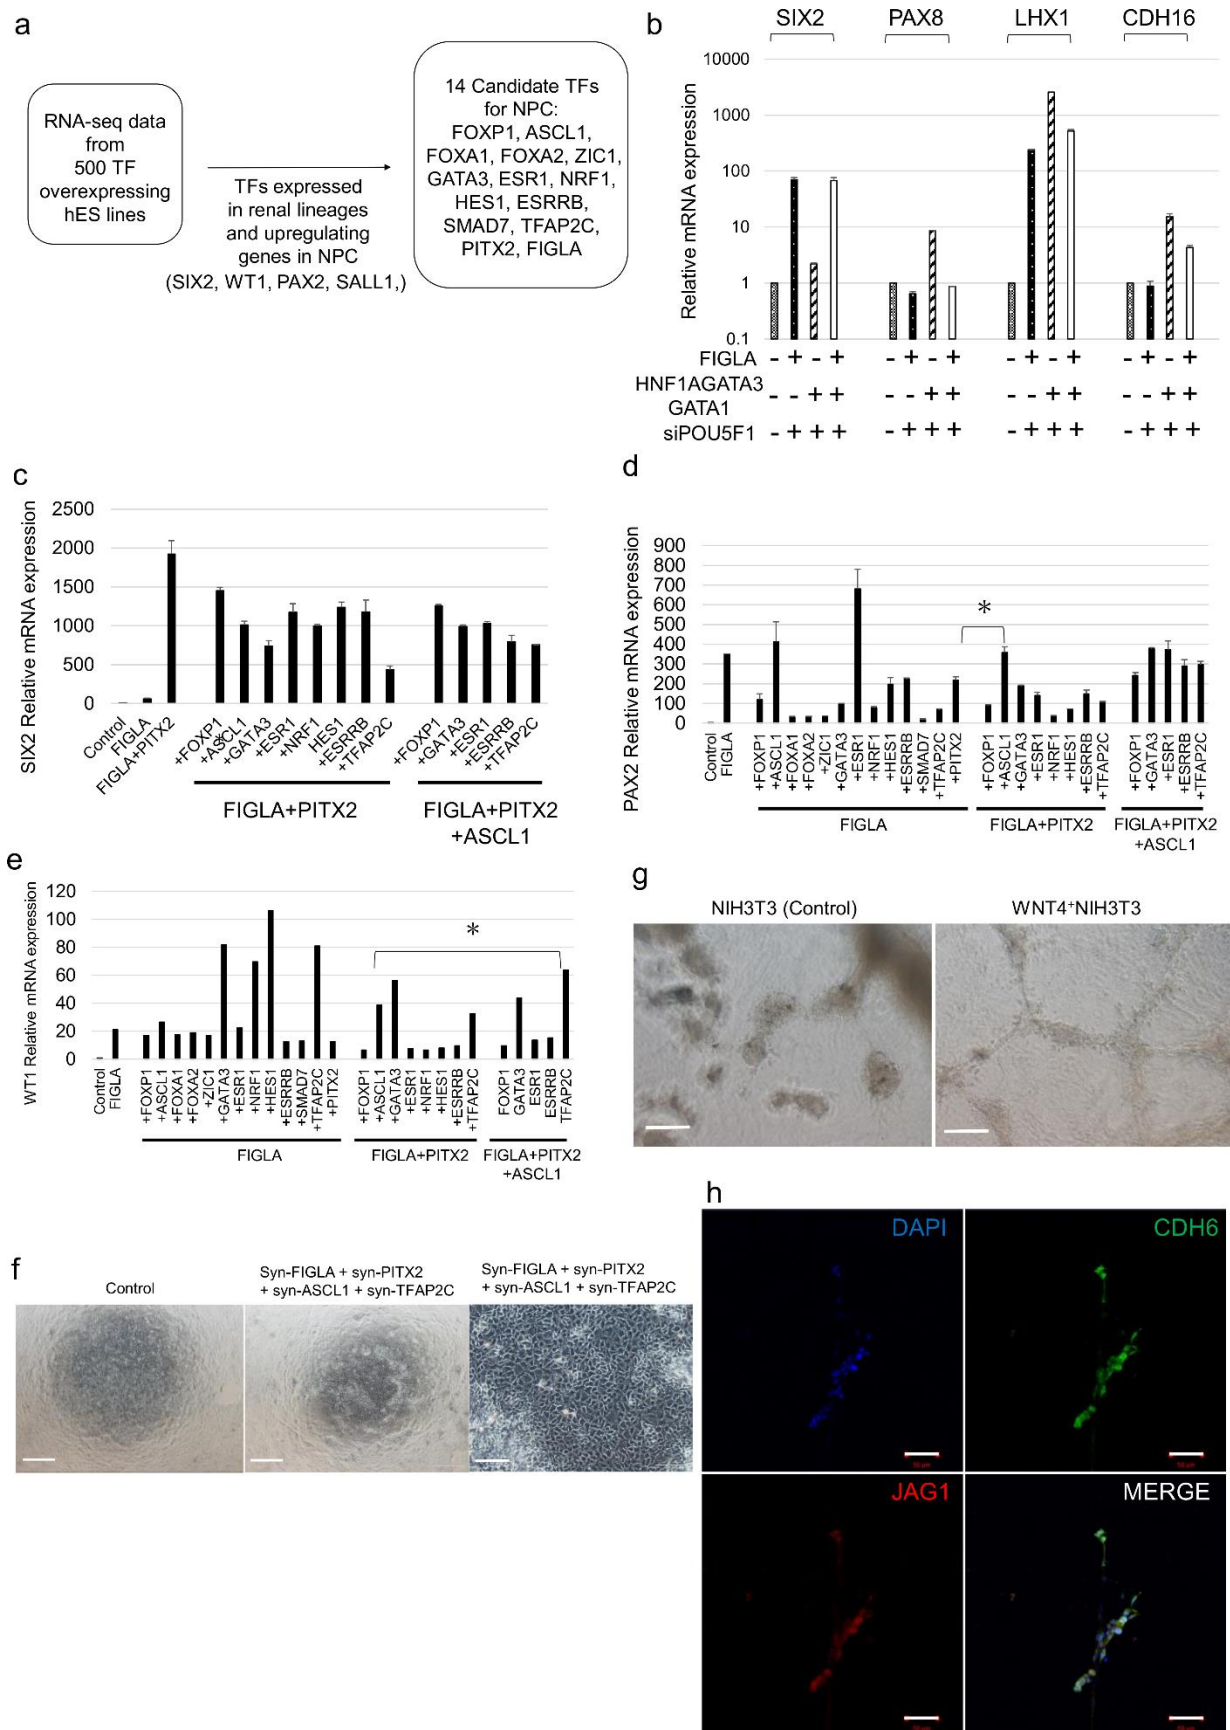

### **Supplementary Figure S3**

(a) Flowchart of an approach to identify NPC specific TFs. (b) Relative mRNA expression levels of SIX2, PAX8, LHX1 and CDH16 after transfecting FIGLA in addition to 3TFs. PAX8, LHX1, CDH16 were down regulated in combination with FIGLA. Data represents mean +s.e.m. (c) Relative mRNA expression levels of SIX2 after transfecting FIGLA, PITX2 and other candidate TF-encoding mRNAs into hESCs. Data represent mean +s.e.m. (d) Relative mRNA expression levels of PAX2 after transfecting FIGLA and other candidate TF-encoding mRNAs into hESCs. Data represents mean +s.e.m. (e) Relative mRNA expression levels of WT1 after transfecting FIGLA and other candidate TF-encoding mRNAs into hESCs. Data represents mean +s.e.m. (f) Representative bright-field images on day 2 of differentiation. Control indicates corresponding control cells without any TFs. Morphological changes of induced NPCs compared to control cells. Scale bar, 500 $\mu$ m (Left, Middle) 100  $\mu$ m (Right). (g) SIX2+SALL1+ cells formed branching structure in matrigel. Scale bar, 200 $\mu$ m. (h) Immunostaining showed branching structures partially expressed JAG1 and CDH6. Scale bar, 50 $\mu$ m. P-values were determined by a Student's t-test. \*P < 0.05; \*\*P < 0.01; \*\*\*P < 0.001.

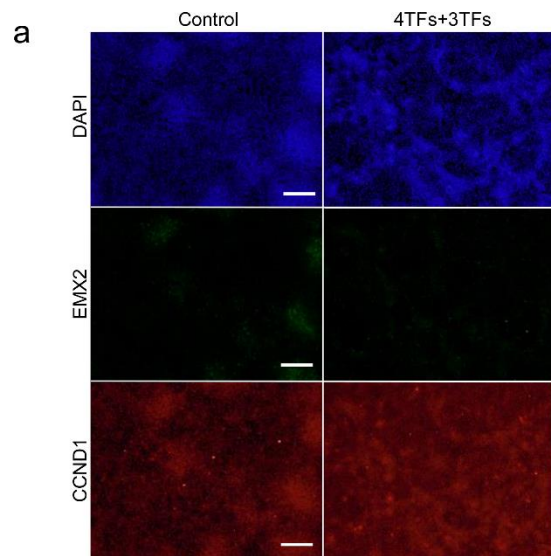

**Supplementary Figure S4**

Immunocytochemistry for EMX2 and CCND1, essential TFs for MET, on day 4 in cells differentiated from hPSCs using protocol depicted in; 4TFs, syn-FIGLA, syn-PITX2, syn-ASCL1, and syn-TFAP2C; 3TFs, syn-HNF1A, syn-GATA3, and syn-GATA1. Scale bar, 200  $\mu$ m.

a

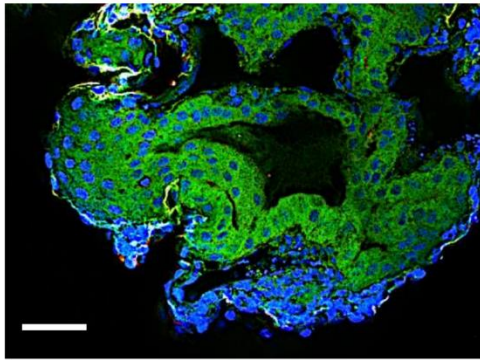

b

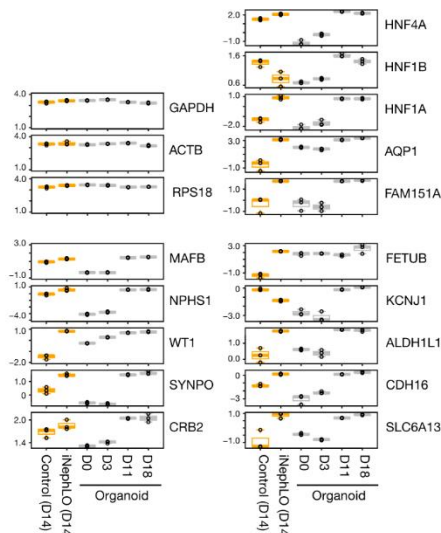

c

| Sample | Control (D14) rep1 | Control (D14) rep2 | Control (D14) rep3 | Control (D14) rep4 | Control (D14) rep5 | Control (D14) rep6 | Control (D14) rep7 | Control (D14) rep8 | Control (D14) rep9 | Control (D14) rep10 | Control (D14) rep11 | Control (D14) rep12 | Control (D14) rep13 | Control (D14) rep14 | Control (D14) rep15 | Control (D14) rep16 | Control (D14) rep17 | Control (D14) rep18 | Control (D14) rep19 | Control (D14) rep20 | Control (D14) rep21 | Control (D14) rep22 | Control (D14) rep23 | Control (D14) rep24 | Control (D14) rep25 | Control (D14) rep26 | Control (D14) rep27 | Control (D14) rep28 | Control (D14) rep29 | Control (D14) rep30 | Control (D14) rep31 | Control (D14) rep32 | Control (D14) rep33 | Control (D14) rep34 | Control (D14) rep35 | Control (D14) rep36 | Control (D14) rep37 | Control (D14) rep38 | Control (D14) rep39 | Control (D14) rep40 | Control (D14) rep41 | Control (D14) rep42 | Control (D14) rep43 | Control (D14) rep44 | Control (D14) rep45 | Control (D14) rep46 | Control (D14) rep47 | Control (D14) rep48 | Control (D14) rep49 | Control (D14) rep50 | Control (D14) rep51 | Control (D14) rep52 | Control (D14) rep53 | Control (D14) rep54 | Control (D14) rep55 | Control (D14) rep56 | Control (D14) rep57 | Control (D14) rep58 | Control (D14) rep59 | Control (D14) rep60 | Control (D14) rep61 | Control (D14) rep62 | Control (D14) rep63 | Control (D14) rep64 | Control (D14) rep65 | Control (D14) rep66 | Control (D14) rep67 | Control (D14) rep68 | Control (D14) rep69 | Control (D14) rep70 | Control (D14) rep71 | Control (D14) rep72 | Control (D14) rep73 | Control (D14) rep74 | Control (D14) rep75 | Control (D14) rep76 | Control (D14) rep77 | Control (D14) rep78 | Control (D14) rep79 | Control (D14) rep80 | Control (D14) rep81 | Control (D14) rep82 | Control (D14) rep83 | Control (D14) rep84 | Control (D14) rep85 | Control (D14) rep86 | Control (D14) rep87 | Control (D14) rep88 | Control (D14) rep89 | Control (D14) rep90 | Control (D14) rep91 | Control (D14) rep92 | Control |
|--------|--------------------|--------------------|--------------------|--------------------|--------------------|--------------------|--------------------|--------------------|--------------------|---------------------|---------------------|---------------------|---------------------|---------------------|---------------------|---------------------|---------------------|---------------------|---------------------|---------------------|---------------------|---------------------|---------------------|---------------------|---------------------|---------------------|---------------------|---------------------|---------------------|---------------------|---------------------|---------------------|---------------------|---------------------|---------------------|---------------------|---------------------|---------------------|---------------------|---------------------|---------------------|---------------------|---------------------|---------------------|---------------------|---------------------|---------------------|---------------------|---------------------|---------------------|---------------------|---------------------|---------------------|---------------------|---------------------|---------------------|---------------------|---------------------|---------------------|---------------------|---------------------|---------------------|---------------------|---------------------|---------------------|---------------------|---------------------|---------------------|---------------------|---------------------|---------------------|---------------------|---------------------|---------------------|---------------------|---------------------|---------------------|---------------------|---------------------|---------------------|---------------------|---------------------|---------------------|---------------------|---------------------|---------------------|---------------------|---------------------|---------------------|---------------------|---------------------|---------------------|---------|
|--------|--------------------|--------------------|--------------------|--------------------|--------------------|--------------------|--------------------|--------------------|--------------------|---------------------|---------------------|---------------------|---------------------|---------------------|---------------------|---------------------|---------------------|---------------------|---------------------|---------------------|---------------------|---------------------|---------------------|---------------------|---------------------|---------------------|---------------------|---------------------|---------------------|---------------------|---------------------|---------------------|---------------------|---------------------|---------------------|---------------------|---------------------|---------------------|---------------------|---------------------|---------------------|---------------------|---------------------|---------------------|---------------------|---------------------|---------------------|---------------------|---------------------|---------------------|---------------------|---------------------|---------------------|---------------------|---------------------|---------------------|---------------------|---------------------|---------------------|---------------------|---------------------|---------------------|---------------------|---------------------|---------------------|---------------------|---------------------|---------------------|---------------------|---------------------|---------------------|---------------------|---------------------|---------------------|---------------------|---------------------|---------------------|---------------------|---------------------|---------------------|---------------------|---------------------|---------------------|---------------------|---------------------|---------------------|---------------------|---------------------|---------------------|---------------------|---------------------|---------------------|---------|

### Supplementary Figure S5

(a) Immunocytochemistry for proximal tubule (LTL) that shows tubule-like structures on day 14. Scale bar, 50  $\mu$ m. (b) Principal component analysis for other human organs, corresponding control cell organoids (shown as Control (D14)) and iNephLOs (shown as iNephLO (D14)), kidney organoids reported previously (GSE70101, shown as organoid (D0, D3, D11, and D18) viewed from different directions. (c) Direct comparison between corresponding control cell organoids (shown as Control (D14)) and iNephLOs (shown as iNephLO (D14)), kidney organoids reported previously (GSE70101, shown as organoid (D0, D3, D11, and D18). Segment-specific makers are normalized by internal controls (GAPDH, ACTB, PRP40, RPS18). ; Podocyte markers; MAFB, NPHS1, WT1, SYNPO, CRB2, ACTN4, ITGB5, GALNT10, EHD3, CD2AP, SH2D4A, TJP1, LAMB2, ITGA8, DDN, LMO7, CLDN5, and NID2; Proximal tubular markers; HNF4A, HNF1B, HNF1A, AQP1, FAM151A, SLC2A5, SLC22A8, SLC22A2, and SLC36A2; Distal tubular markers; FETUB, SLC12A1, KCNJ1, ALDH1L1, CDH16, SLC4A1, SLC12A3, CALB1, ATP6V0D2, SLC6A13, PTH1R, EMX1, and CLCNKA.

### Supplementary video 1

The three-dimensional (3D) image stacks were further processed using Imaris 3D software. It shows multi-segmented kidney structures containing podocytes (PODXL), proximal tubules (LTL), and distal tubules (CDH1) by day 14.

### Supplementary data 1

Principal component analysis of transcriptome data obtained from various human organs, corresponding control cell organoids (shown as Control (D14)) and iNephLOs (shown as iNephLO (D14)), kidney organoids reported previously (GSE70101, shown as organoid (D0, D3, D11, and D18).

### Supplementary Table S1. List of gene accession numbers

| Transcription factor | Accession Number |
|----------------------|------------------|
| FIGLA                | BC148798         |
| PITX2                | BC013998         |
| ASCL1                | NM_004316.3      |
| TFAP2C               | BC051829         |
| HNF1A                | EU446660.1       |
| GATA3                | BC006793.1       |
| GATA1                | AB463674         |
| EMX2                 | AB463605         |

**Supplementary Table S2. List of primary antibodies**

| Antibody | Source                                                                                 | Catalog or clone number | Dilution |
|----------|----------------------------------------------------------------------------------------|-------------------------|----------|
| AQP1     | Santa cruz                                                                             | H-55                    | 1:100    |
| CDH16    | home made                                                                              |                         | 1:50     |
| PAX2     | BioLegend                                                                              | PRB-276P                | 1:500    |
| LRP2     | kindly provided by Dr. Michiko Sekine, Tokyo Metropolitan Institute of Medical Science |                         | 1:100    |
| PAX8     | Proteintech                                                                            | 10336-1-AP              | 1:500    |
| LHX1     | Developmental Studies Hybridoma Bank                                                   | 4F2-c                   | 1:50     |
| SIX2     | Proteintech                                                                            | 11562-1-AP              | 1:500    |
| SALL1    | R&D systems                                                                            | PP-K9814-00             | 1:100    |
| EMX2     | Abnova                                                                                 | H00002018-M02           | 1:100    |
| CCND1    | Abcam                                                                                  | ab134175                | 1:50     |
| CDH1     | Abcam                                                                                  | ab11512                 | 1:100    |
| CDH6     | Atlas antibodies                                                                       | HPA007456               | 1:500    |
| JAG1     | Santa cruz                                                                             | C-20                    | 1:50     |
| CDH2     | Abcam                                                                                  | ab98952                 | 1:100    |
| PNA      | Vector laboratories                                                                    | RL-1071                 | 1:200    |
| PODXL    | R&D systems                                                                            | AF1658                  | 1:500    |
| BRN1     | Santa cruz                                                                             | C-17                    | 1:100    |
| LTL      | Vector laboratories                                                                    | B-1325                  | 1:200    |
| THP      | Alfa aesar                                                                             | J65429                  | 1:150    |
| KIM1     | R&D systems                                                                            | AF-1750                 | 1:200    |
| HNF1A    | Abcam                                                                                  | ab96777                 | 1:100    |

**Supplementary Table S3. Primer sequences**

| Gene     | Forward                 | Reverse                 |
|----------|-------------------------|-------------------------|
| ACTB     | CAATGTGGCCGAGGACTTTG    | CATTCTCCTTAGAGAGAAGTGG  |
| CDH16    | GGTACAGGTCAAGGACATGGG   | TGCGGGTATAGGACTTTGAGAT  |
| AQP1     | TCTCTGTAGCCCTTGGACACC   | GCCAGGATGAAGTCGTAGATGAG |
| PAX2     | GCAACCCCGCCTTACTAAT     | AACTAGTGGCGGTCATAGGC    |
| LRP2     | TGTGATGCAGCCATCGAACT    | TGCATTGGGGAGGTCAGTC     |
| POU5F1   | TGGAGTTTGTGCCAGGGTTT    | CTTCACCTCCCTCCAACCA     |
| PODXL    | GCAGAGAGGGCAAGAGTAAACTG | GAGTCATCTGTGTCCTCCATGCT |
| NPHS1    | CGCAGGAGGAGGTGTCTTATTC  | CGGGTTCCAGAGTGTCCAAG    |
| PAX8     | CCCCCTACTCCTCCTACAGC    | GGCCTTGATGTGGAAGTGTA    |
| LHX1     | ATGCAACCTGACCGAGAAGT    | CAGGTCGCTAGGGGAGATG     |
| BRN1     | TGCCCCAAAGGAAAGATGTC    | CATTCTCCTCGCAACAGTCA    |
| SIX2     | AGGAAAGGGAGAACAACGAGAA  | GGGCTGGATGATGAGTGGT     |
| WT1      | GGCAGCACAGTGTGTGAACT    | CCAGGCACACCTGGTAGTTT    |
| SNAI2    | CTGCGGCAAGGCGTTTTCCAGA  | CAGATGAGCCCTCAGATTTGAC  |
| VIMENTIN | ACACCCTGCAATCTTTCAGACA  | GATTCCACTTTGCGTTCAAGGT  |
| HNF1B    | AGAAGCGTGCCGCTCTGT      | TGGTTGAATTGTCGGAGGATCT  |
| HNF1A    | CCCACCAAGCAGGTCTTCAC    | AAGGTCTCGATGACGCTGTG    |
